# Supplementary material
Source: Springer Nature journal article supplement (https://www.springermedizin.de/resource/supplementary/12885_2011_2766_MOESM4_ESM.pdf/9461868)

**A****(i)**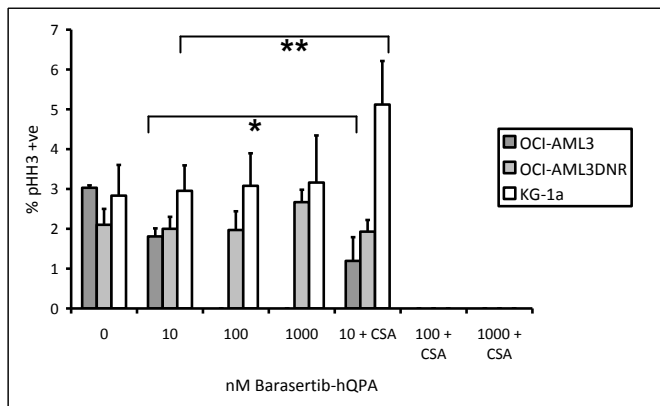**(ii)**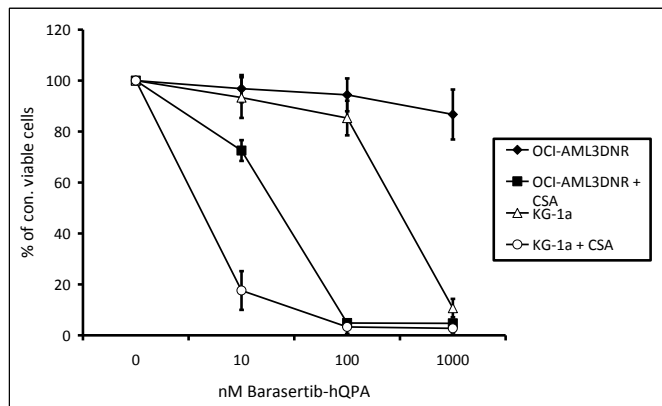**B****(i)**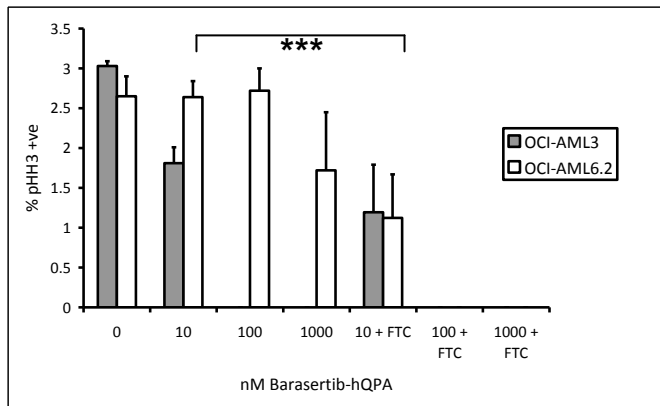**(ii)**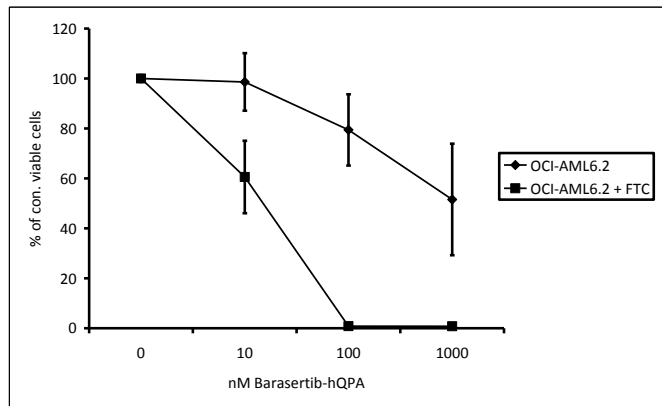

Supplement: MOESM4 [file 9461868]
